# Supplementary material
Source: HighWire-hosted journal article supplement (https://erj.ersjournals.com/content/54/5/1900970)
Supplement: inline-supplementary-material-1 [file inline-supplementary-material-1.pdf]

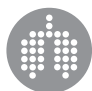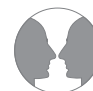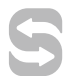

SHAREABLE PDF

# Training dogs to differentiate *Pseudomonas aeruginosa* from other cystic fibrosis bacterial pathogens: not to be sniffed at?

Jane C. Davies<sup>1,2</sup>, Eric Alton<sup>1,2</sup>, Ameze Simbo <sup>1</sup>, Ronan Murphy<sup>1</sup>, Ishani Seth<sup>1</sup>, Kate Williams <sup>3</sup>, Mark Somerville<sup>3</sup>, Libby Jolly<sup>3</sup>, Steve Morant <sup>3</sup> and Claire Guest<sup>3</sup>

**Affiliations:** <sup>1</sup>National Heart and Lung Institute, Imperial College, London, UK. <sup>2</sup>Royal Brompton and Harefield NHS Foundation Trust, London. <sup>3</sup>Medical Detection Dogs, Milton Keynes, UK.

**Correspondence:** Jane C. Davies, National Heart and Lung Institute, Imperial College London, 1B Manresa Rd, London SW3 6LR, UK. E-mail: j.c.davies@imperial.ac.uk

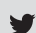

@ERSpublications

Detection dogs can be trained to distinguish the major cystic fibrosis pathogen, *P. aeruginosa*, from a range of organisms. High sensitivity/specificity support the harnessing of this skill to detection in clinical airway samples. <http://bit.ly/31GHI0Y>

**Cite this article as:** Davies JC, Alton E, Simbo A, *et al.* Training dogs to differentiate *Pseudomonas aeruginosa* from other cystic fibrosis bacterial pathogens: not to be sniffed at?. *Eur Respir J* 2019; 54: 1900970 [<https://doi.org/10.1183/13993003.00970-2019>].

This single-page version can be shared freely online.

## To the Editor:

The major cause of lung damage in cystic fibrosis (CF) is infection with bacterial pathogens, the most prevalent of which is *Pseudomonas aeruginosa*, chronically infecting ~60% patients by adolescence/adulthood ([www.cysticfibrosis.org.uk/news/registry-report-2017](http://www.cysticfibrosis.org.uk/news/registry-report-2017)). *P. aeruginosa* may be successfully eradicated, but frequently recurs and establishes biofilms resistant to antibiotics/host defences [1]. Chronic *P. aeruginosa* is closely linked with pulmonary exacerbation frequency, faster lung function decline and earlier mortality [2]. The huge antibiotic burden imposed upon patients and the resulting bacterial resistance, allergies and toxicities compound the detrimental impact of the infection itself. Chronic *P. aeruginosa* should be avoided if at all possible; early detection and rapid treatment may be crucial in achieving this.
